# Supplementary material for: The Roles of MTRR and MTHFR Gene Polymorphisms in Colorectal Cancer Survival
Source: MDPI journal article supplement (doi:10.3390/nu14214594), 2022-11-01
Supplement: s1 [file s1]

**Table S1.** Association Between *MTRR* SNPs and Colorectal Cancer Overall, Disease-Free and CRC Specific Survival Assuming an Additive Mode of Inheritance.

|                                    | Position <sup>a</sup> | Minor/Major<br>allele (MAF) | All              |       |                               | Colon            |       |                               | Rectum           |       |                               |
|------------------------------------|-----------------------|-----------------------------|------------------|-------|-------------------------------|------------------|-------|-------------------------------|------------------|-------|-------------------------------|
|                                    |                       |                             | HR (95%CI)       | P     | P <sub>ACT</sub> <sup>d</sup> | HR (95%CI)       | P     | P <sub>ACT</sub> <sup>d</sup> | HR (95%CI)       | P     | P <sub>ACT</sub> <sup>d</sup> |
| Overall survival <sup>b</sup>      |                       |                             |                  |       |                               |                  |       |                               |                  |       |                               |
| rs1801394                          | 7870973               | A/ <u>C</u> (0.430)         | 0.77 (0.60,0.98) | 0.036 | 0.491                         | 0.66 (0.47,0.91) | 0.011 | 0.206                         | 1.00 (0.65,1.53) | 0.980 | 1.000                         |
| rs13181011                         | 7874424               | C/ <u>T</u> (0.196)         | 1.27 (0.92,1.76) | 0.154 | 0.875                         | 1.54 (1.04,2.28) | 0.031 | 0.430                         | 0.88 (0.46,1.68) | 0.703 | 1.000                         |
| rs7730643                          | 7875963               | G/ <u>A</u> (0.168)         | 1.08 (0.76,1.53) | 0.683 | 1.000                         | 1.03 (0.63,1.67) | 0.912 | 1.000                         | 1.13 (0.66,1.91) | 0.661 | 1.000                         |
| rs326121                           | 7876288               | C/ <u>T</u> (0.239)         | 0.99 (0.74,1.32) | 0.925 | 1.000                         | 0.93 (0.63,1.38) | 0.712 | 1.000                         | 0.94 (0.57,1.56) | 0.808 | 1.000                         |
| rs3776467                          | 7876315               | C/ <u>T</u> (0.247)         | 0.70 (0.50,0.98) | 0.036 | 0.483                         | 0.69 (0.45,1.06) | 0.091 | 0.744                         | 0.65 (0.37,1.14) | 0.134 | 0.899                         |
| rs326123                           | 7876861               | G/ <u>A</u> (0.402)         | 1.16 (0.90,1.50) | 0.261 | 0.968                         | 1.21 (0.88,1.66) | 0.236 | 0.935                         | 1.12 (0.70,1.81) | 0.635 | 1.000                         |
| rs326124                           | 7877178               | A/ <u>C</u> (0.178)         | 1.11 (0.78,1.59) | 0.563 | 1.000                         | 1.29 (0.81,2.08) | 0.285 | 0.950                         | 0.85 (0.48,1.53) | 0.588 | 1.000                         |
| rs1532268                          | 7878179               | A/ <u>C</u> (0.349)         | 1.03 (0.78,1.36) | 0.828 | 1.000                         | 1.21 (0.85,1.71) | 0.289 | 0.951                         | 0.90 (0.56,1.44) | 0.650 | 1.000                         |
| rs7703033                          | 7879950               | A/ <u>C</u> (0.334)         | 1.09 (0.84,1.42) | 0.518 | 1.000                         | 1.18 (0.84,1.67) | 0.346 | 0.968                         | 0.88 (0.56,1.38) | 0.589 | 1.000                         |
| rs6555501                          | 7879983               | C/ <u>T</u> (0.429)         | 1.03 (0.81,1.32) | 0.794 | 1.000                         | 0.99 (0.73,1.34) | 0.927 | 1.000                         | 1.01 (0.65,1.58) | 0.953 | 1.000                         |
| rs162031                           | 7880287               | T/ <u>C</u> (0.210)         | 1.05 (0.76,1.44) | 0.767 | 1.000                         | 0.98 (0.65,1.48) | 0.915 | 1.000                         | 1.21 (0.71,2.05) | 0.491 | 1.000                         |
| rs162033                           | 7880835               | T/ <u>C</u> (0.419)         | 0.99 (0.78,1.26) | 0.932 | 1.000                         | 0.89 (0.65,1.21) | 0.439 | 0.982                         | 1.07 (0.69,1.67) | 0.762 | 1.000                         |
| rs161871                           | 7884389               | G/ <u>A</u> (0.166)         | 0.93 (0.66,1.30) | 0.659 | 1.000                         | 0.85 (0.56,1.30) | 0.456 | 0.982                         | 1.08 (0.57,2.05) | 0.819 | 1.000                         |
| rs162040                           | 7887478               | C/ <u>A</u> (0.153)         | 0.92 (0.62,1.35) | 0.652 | 1.000                         | 0.77 (0.46,1.30) | 0.331 | 0.968                         | 1.17 (0.62,2.24) | 0.629 | 1.000                         |
| rs3776455                          | 7896511               | G/ <u>A</u> (0.344)         | 0.89 (0.68,1.17) | 0.410 | 0.993                         | 0.75 (0.53,1.08) | 0.122 | 0.810                         | 1.13 (0.74,1.72) | 0.587 | 1.000                         |
| rs10380                            | 7897191               | T/ <u>C</u> (0.095)         | 0.90 (0.60,1.34) | 0.596 | 1.000                         | 0.70 (0.42,1.18) | 0.181 | 0.887                         | 1.56 (0.73,3.36) | 0.252 | 0.985                         |
| rs9332                             | 7900712               | T/ <u>C</u> (0.113)         | 0.82 (0.55,1.22) | 0.323 | 0.975                         | 0.64 (0.39,1.08) | 0.093 | 0.733                         | 1.33 (0.62,2.86) | 0.465 | 1.000                         |
| Disease-free survival <sup>b</sup> |                       |                             |                  |       |                               |                  |       |                               |                  |       |                               |
| rs1801394                          | 7870973               | A/ <u>C</u> (0.430)         | 0.72 (0.57,0.90) | 0.005 | 0.105                         | 0.60 (0.44,0.81) | 0.001 | 0.024                         | 0.98 (0.67,1.44) | 0.909 | 1.000                         |
| rs13181011                         | 7874424               | C/ <u>T</u> (0.196)         | 1.35 (1.00,1.82) | 0.048 | 0.556                         | 1.62 (1.11,2.35) | 0.012 | 0.213                         | 0.93 (0.54,1.62) | 0.809 | 1.000                         |
| rs7730643                          | 7875963               | G/ <u>A</u> (0.168)         | 1.10 (0.80,1.50) | 0.565 | 1.000                         | 0.99 (0.64,1.53) | 0.952 | 1.000                         | 1.15 (0.72,1.86) | 0.554 | 1.000                         |
| rs326121                           | 7876288               | C/ <u>T</u> (0.239)         | 0.94 (0.72,1.22) | 0.634 | 1.000                         | 0.86 (0.60,1.23) | 0.406 | 0.988                         | 1.04 (0.67,1.60) | 0.874 | 1.000                         |
| rs3776467                          | 7876315               | C/ <u>T</u> (0.247)         | 0.72 (0.53,0.96) | 0.026 | 0.388                         | 0.71 (0.49,1.03) | 0.074 | 0.697                         | 0.67 (0.41,1.10) | 0.116 | 0.863                         |
| rs326123                           | 7876861               | G/ <u>A</u> (0.402)         | 1.05 (0.83,1.33) | 0.683 | 1.000                         | 1.06 (0.79,1.42) | 0.694 | 1.000                         | 1.02 (0.68,1.55) | 0.918 | 1.000                         |
| rs326124                           | 7877178               | A/ <u>C</u> (0.178)         | 1.41 (1.01,1.97) | 0.043 | 0.529                         | 1.63 (1.04,2.56) | 0.032 | 0.434                         | 1.14 (0.66,1.97) | 0.632 | 1.000                         |
| rs1532268                          | 7878179               | A/ <u>C</u> (0.349)         | 1.15 (0.90,1.46) | 0.275 | 0.981                         | 1.33 (0.97,1.83) | 0.079 | 0.701                         | 0.89 (0.59,1.34) | 0.574 | 1.000                         |
| rs7703033                          | 7879950               | A/ <u>C</u> (0.334)         | 1.13 (0.89,1.44) | 0.311 | 0.981                         | 1.29 (0.94,1.77) | 0.120 | 0.818                         | 0.92 (0.62,1.37) | 0.697 | 1.000                         |
| rs6555501                          | 7879983               | C/ <u>T</u> (0.429)         | 1.03 (0.83,1.29) | 0.783 | 1.000                         | 1.05 (0.80,1.40) | 0.718 | 1.000                         | 1.04 (0.70,1.53) | 0.855 | 1.000                         |
| rs162031                           | 7880287               | T/ <u>C</u> (0.210)         | 0.86 (0.64,1.15) | 0.297 | 0.985                         | 0.76 (0.52,1.13) | 0.175 | 0.900                         | 1.03 (0.63,1.67) | 0.905 | 1.000                         |
| rs162033                           | 7880835               | T/ <u>C</u> (0.419)         | 0.99 (0.79,1.23) | 0.898 | 1.000                         | 0.95 (0.72,1.26) | 0.718 | 1.000                         | 1.14 (0.77,1.70) | 0.520 | 1.000                         |
| rs161871                           | 7884389               | G/ <u>A</u> (0.166)         | 0.93 (0.68,1.26) | 0.620 | 1.000                         | 0.79 (0.54,1.16) | 0.224 | 0.941                         | 1.30 (0.76,2.24) | 0.331 | 0.996                         |
| rs162040                           | 7887478               | C/ <u>A</u> (0.153)         | 0.71 (0.49,1.02) | 0.062 | 0.632                         | 0.58 (0.35,0.96) | 0.034 | 0.449                         | 0.85 (0.48,1.53) | 0.593 | 1.000                         |
| rs3776455                          | 7896511               | G/ <u>A</u> (0.344)         | 0.78 (0.61,0.99) | 0.044 | 0.532                         | 0.62 (0.44,0.86) | 0.005 | 0.102                         | 1.07 (0.72,1.57) | 0.750 | 1.000                         |
| rs10380                            | 7897191               | T/ <u>C</u> (0.095)         | 0.82 (0.56,1.20) | 0.304 | 0.983                         | 0.71 (0.45,1.14) | 0.156 | 0.881                         | 1.51 (0.75,3.02) | 0.248 | 0.983                         |
| rs9332                             | 7900712               | T/ <u>C</u> (0.113)         | 0.77 (0.54,1.12) | 0.173 | 0.921                         | 0.64 (0.40,1.01) | 0.057 | 0.611                         | 1.46 (0.75,2.83) | 0.268 | 0.987                         |
| CRC specific survival <sup>c</sup> |                       |                             |                  |       |                               |                  |       |                               |                  |       |                               |
| rs1801394                          | 7870973               | A/ <u>C</u> (0.438)         | 0.73 (0.49,1.07) | 0.106 | 0.769                         | 0.42 (0.23,0.78) | 0.006 | 0.108                         | 1.17 (0.65,2.10) | 0.597 | 1.000                         |
| rs13181011                         | 7874424               | C/ <u>T</u> (0.197)         | 1.40 (0.87,2.23) | 0.164 | 0.878                         | 1.84 (1.03,3.29) | 0.039 | 0.396                         | 0.68 (0.25,1.80) | 0.433 | 0.998                         |
| rs7730643                          | 7875963               | G/ <u>A</u> (0.173)         | 1.03 (0.62,1.71) | 0.901 | 1.000                         | 0.62 (0.26,1.46) | 0.274 | 0.931                         | 1.46 (0.73,2.94) | 0.287 | 0.987                         |
| rs326121                           | 7876288               | C/ <u>T</u> (0.240)         | 0.99 (0.66,1.49) | 0.958 | 1.000                         | 0.82 (0.43,1.56) | 0.537 | 1.000                         | 0.97 (0.51,1.86) | 0.934 | 1.000                         |
| rs3776467                          | 7876315               | C/ <u>T</u> (0.257)         | 0.73 (0.45,1.16) | 0.181 | 0.895                         | 0.57 (0.28,1.18) | 0.131 | 0.777                         | 0.62 (0.27,1.43) | 0.259 | 0.984                         |
| rs326123                           | 7876861               | G/ <u>A</u> (0.398)         | 1.06 (0.71,1.58) | 0.789 | 1.000                         | 1.06 (0.63,1.79) | 0.836 | 1.000                         | 0.95 (0.45,2.03) | 0.896 | 1.000                         |
| rs326124                           | 7877178               | A/ <u>C</u> (0.175)         | 1.38 (0.77,2.46) | 0.278 | 0.952                         | 2.54 (0.96,6.74) | 0.061 | 0.525                         | 0.80 (0.35,1.83) | 0.596 | 1.000                         |
| rs1532268                          | 7878179               | A/ <u>C</u> (0.353)         | 1.03 (0.69,1.53) | 0.882 | 1.000                         | 1.04 (0.61,1.78) | 0.878 | 1.000                         | 0.91 (0.47,1.79) | 0.792 | 1.000                         |
| rs7703033                          | 7879950               | A/ <u>C</u> (0.326)         | 1.04 (0.70,1.54) | 0.842 | 1.000                         | 1.49 (0.82,2.73) | 0.192 | 0.875                         | 0.67 (0.32,1.38) | 0.275 | 0.985                         |
| rs6555501                          | 7879983               | C/ <u>T</u> (0.427)         | 1.16 (0.81,1.68) | 0.423 | 0.991                         | 1.37 (0.83,2.24) | 0.216 | 0.902                         | 1.06 (0.50,2.23) | 0.883 | 1.000                         |
| rs162031                           | 7880287               | T/ <u>C</u> (0.203)         | 0.71 (0.40,1.23) | 0.221 | 0.927                         | 0.35 (0.13,0.92) | 0.033 | 0.355                         | 1.16 (0.55,2.46) | 0.697 | 1.000                         |
| rs162033                           | 7880835               | T/ <u>C</u> (0.418)         | 1.16 (0.78,1.71) | 0.463 | 0.995                         | 1.28 (0.76,2.13) | 0.352 | 0.960                         | 1.14 (0.50,2.60) | 0.750 | 1.000                         |
| rs161871                           | 7884389               | G/ <u>A</u> (0.174)         | 1.16 (0.74,1.84) | 0.518 | 1.000                         | 1.21 (0.67,2.18) | 0.526 | 1.000                         | 1.35 (0.60,3.02) | 0.471 | 0.998                         |
| rs162040                           | 7887478               | C/ <u>A</u> (0.154)         | 0.84 (0.46,1.54) | 0.571 | 1.000                         | 0.45 (0.17,1.22) | 0.115 | 0.746                         | 1.36 (0.56,3.27) | 0.498 | 0.999                         |
| rs3776455                          | 7896511               | G/ <u>A</u> (0.350)         | 0.94 (0.63,1.40) | 0.759 | 1.000                         | 0.77 (0.43,1.37) | 0.372 | 0.964                         | 1.29 (0.72,2.29) | 0.391 | 0.997                         |
| rs10380                            | 7897191               | T/ <u>C</u> (0.101)         | 1.27 (0.76,2.12) | 0.354 | 0.982                         | 1.10 (0.56,2.15) | 0.786 | 1.000                         | 2.49 (1.03,6.03) | 0.043 | 0.544                         |
| rs9332                             | 7900712               | T/ <u>C</u> (0.122)         | 1.24 (0.75,2.06) | 0.405 | 0.990                         | 1.15 (0.60,2.20) | 0.684 | 1.000                         | 2.04 (0.83,5.04) | 0.123 | 0.866                         |

Abbreviations: CRC, colorectal cancer; *MTRR*, methionine synthase reductase; SNPs, single nucleotide polymorphisms; HR, hazard ratio; MAF, minor allele frequency. <sup>a</sup> SNPs locations were mapped according to the NCBI build 36 coordinates. <sup>b</sup> Hazard ratio calculated in reference to the allele underlined. Cox proportional hazard model adjusted for sex, age at diagnosis, stage at diagnosis, race, marital status and MSI status. <sup>c</sup> Hazard ratio calculated in reference to the allele underlined. Cox

proportional hazard model adjusted for sex, age at diagnosis, stage at diagnosis, drink status, marital status and MSI status. <sup>d</sup> *P*-values were adjusted for multiple comparisons using a modification of *P*<sub>ACT</sub> for correlated tests developed by Conneely and Boehnke [35].

**Table S2.** Association Between *MTHFR* SNPs and Colorectal Cancer Overall, Disease-Free and CRC-Specific Survival Assuming an Additive Mode of Inheritance.

|                                    | Position <sup>a</sup> | Minor/Major allele (MAF) | All              |         |                               | Colon            |         |                               | Rectum           |       |                               |
|------------------------------------|-----------------------|--------------------------|------------------|---------|-------------------------------|------------------|---------|-------------------------------|------------------|-------|-------------------------------|
|                                    |                       |                          | HR (95%CI)       | P       | P <sub>ACT</sub> <sup>d</sup> | HR (95%CI)       | P       | P <sub>ACT</sub> <sup>d</sup> | HR (95%CI)       | P     | P <sub>ACT</sub> <sup>d</sup> |
| Overall survival <sup>b</sup>      |                       |                          |                  |         |                               |                  |         |                               |                  |       |                               |
| rs4846048                          | 11846252              | G/ <u>A</u> (0.295)      | 1.15 (0.89,1.49) | 0.297   | 0.972                         | 1.26 (0.91,1.76) | 0.167   | 0.874                         | 0.82 (0.51,1.32) | 0.416 | 0.999                         |
| rs2184226                          | 11847436              | G/ <u>A</u> (0.069)      | 0.77 (0.46,1.30) | 0.323   | 0.978                         | 0.62 (0.29,1.33) | 0.218   | 0.924                         | 0.91 (0.43,1.95) | 0.814 | 1.000                         |
| rs3737966                          | 11847759              | G/ <u>A</u> (0.391)      | 1.24 (0.97,1.57) | 0.082   | 0.723                         | 1.30 (0.95,1.77) | 0.102   | 0.761                         | 1.06 (0.70,1.61) | 0.789 | 1.000                         |
| rs4846049                          | 11850365              | T/ <u>G</u> (0.327)      | 1.37 (1.06,1.76) | 0.017   | 0.289                         | 1.48 (1.08,2.04) | 0.016   | 0.271                         | 1.07 (0.67,1.70) | 0.773 | 1.000                         |
| rs1476413                          | 11852300              | A/ <u>G</u> (0.266)      | 1.34 (1.02,1.76) | 0.038   | 0.484                         | 1.38 (0.96,1.98) | 0.080   | 0.733                         | 1.27 (0.79,2.05) | 0.323 | 0.996                         |
| rs1801131                          | 11854476              | C/ <u>A</u> (0.311)      | 1.37 (1.06,1.78) | 0.015   | 0.264                         | 1.50 (1.08,2.07) | 0.014   | 0.244                         | 1.06 (0.67,1.68) | 0.810 | 1.000                         |
| rs12121543                         | 11854671              | A/ <u>C</u> (0.243)      | 1.33 (1.01,1.75) | 0.045   | 0.537                         | 1.53 (1.07,2.19) | 0.021   | 0.330                         | 0.95 (0.57,1.57) | 0.835 | 1.000                         |
| rs1801133                          | 11856378              | T/ <u>C</u> (0.318)      | 0.90 (0.70,1.16) | 0.416   | 0.989                         | 0.88 (0.63,1.22) | 0.430   | 0.987                         | 1.09 (0.68,1.74) | 0.735 | 1.000                         |
| rs1572151                          | 11857711              | G/ <u>A</u> (0.068)      | 0.80 (0.47,1.36) | 0.414   | 0.993                         | 0.65 (0.30,1.41) | 0.280   | 0.960                         | 0.92 (0.43,1.99) | 0.838 | 1.000                         |
| rs4846052                          | 11857951              | T/ <u>C</u> (0.397)      | 1.28 (1.00,1.64) | 0.050   | 0.554                         | 1.36 (0.99,1.87) | 0.061   | 0.642                         | 1.07 (0.70,1.64) | 0.769 | 1.000                         |
| rs2066471                          | 11860458              | A/ <u>G</u> (0.174)      | 1.22 (0.89,1.68) | 0.221   | 0.947                         | 1.36 (0.89,2.07) | 0.156   | 0.863                         | 0.96 (0.56,1.65) | 0.889 | 1.000                         |
| rs13306567                         | 11860465              | C/ <u>G</u> (0.062)      | 1.26 (0.83,1.92) | 0.285   | 0.975                         | 1.61 (0.94,2.78) | 0.086   | 0.745                         | 0.71 (0.30,1.66) | 0.427 | 1.000                         |
| rs7533315                          | 11860683              | T/ <u>C</u> (0.240)      | 1.08 (0.80,1.45) | 0.617   | 1.000                         | 1.15 (0.77,1.71) | 0.496   | 0.964                         | 0.89 (0.55,1.44) | 0.627 | 1.000                         |
| rs9651118                          | 11862214              | C/ <u>T</u> (0.254)      | 0.80 (0.59,1.08) | 0.144   | 0.871                         | 0.77 (0.53,1.11) | 0.154   | 0.874                         | 0.88 (0.50,1.54) | 0.650 | 1.000                         |
| rs7553194                          | 11864149              | A/ <u>G</u> (0.095)      | 1.38 (0.93,2.06) | 0.114   | 0.822                         | 1.19 (0.72,1.97) | 0.493   | 0.981                         | 2.52 (1.19,5.34) | 0.016 | 0.276                         |
| rs13306561                         | 11865804              | C/ <u>T</u> (0.158)      | 1.39 (1.01,1.92) | 0.045   | 0.528                         | 1.43 (0.95,2.17) | 0.086   | 0.752                         | 1.35 (0.75,2.40) | 0.316 | 0.995                         |
| Disease-free survival <sup>b</sup> |                       |                          |                  |         |                               |                  |         |                               |                  |       |                               |
| rs4846048                          | 11846252              | G/ <u>A</u> (0.295)      | 1.05 (0.83,1.34) | 0.675   | 1.000                         | 1.17 (0.86,1.59) | 0.314   | 0.973                         | 0.84 (0.55,1.29) | 0.432 | 0.999                         |
| rs2184226                          | 11847436              | G/ <u>A</u> (0.069)      | 0.80 (0.49,1.30) | 0.362   | 0.987                         | 0.77 (0.39,1.50) | 0.438   | 0.985                         | 0.87 (0.41,1.83) | 0.715 | 1.000                         |
| rs3737966                          | 11847759              | G/ <u>A</u> (0.391)      | 1.20 (0.96,1.49) | 0.114   | 0.824                         | 1.26 (0.95,1.68) | 0.106   | 0.786                         | 1.11 (0.76,1.62) | 0.583 | 1.000                         |
| rs4846049                          | 11850365              | T/ <u>G</u> (0.327)      | 1.19 (0.94,1.50) | 0.155   | 0.898                         | 1.29 (0.96,1.73) | 0.097   | 0.759                         | 1.01 (0.67,1.53) | 0.962 | 1.000                         |
| rs1476413                          | 11852300              | A/ <u>G</u> (0.266)      | 1.15 (0.89,1.49) | 0.280   | 0.981                         | 1.20 (0.87,1.67) | 0.270   | 0.957                         | 1.03 (0.67,1.59) | 0.901 | 1.000                         |
| rs1801131                          | 11854476              | C/ <u>A</u> (0.311)      | 1.19 (0.94,1.50) | 0.160   | 0.905                         | 1.28 (0.94,1.72) | 0.113   | 0.802                         | 1.03 (0.69,1.54) | 0.878 | 1.000                         |
| rs12121543                         | 11854671              | A/ <u>C</u> (0.243)      | 1.13 (0.87,1.46) | 0.359   | 0.989                         | 1.28 (0.92,1.78) | 0.143   | 0.863                         | 0.83 (0.53,1.30) | 0.405 | 0.999                         |
| rs1801133                          | 11856378              | T/ <u>C</u> (0.318)      | 0.90 (0.71,1.15) | 0.392   | 0.988                         | 0.91 (0.67,1.24) | 0.551   | 1.000                         | 0.89 (0.58,1.36) | 0.595 | 1.000                         |
| rs1572151                          | 11857711              | G/ <u>A</u> (0.068)      | 0.77 (0.47,1.26) | 0.304   | 0.980                         | 0.70 (0.36,1.37) | 0.299   | 0.969                         | 0.93 (0.44,1.97) | 0.853 | 1.000                         |
| rs4846052                          | 11857951              | T/ <u>C</u> (0.397)      | 1.11 (0.89,1.40) | 0.356   | 0.989                         | 1.19 (0.89,1.60) | 0.249   | 0.945                         | 1.01 (0.69,1.47) | 0.954 | 1.000                         |
| rs2066471                          | 11860458              | A/ <u>G</u> (0.174)      | 1.05 (0.78,1.41) | 0.739   | 1.000                         | 1.17 (0.80,1.71) | 0.426   | 0.985                         | 0.84 (0.51,1.38) | 0.498 | 1.000                         |
| rs13306567                         | 11860465              | C/ <u>G</u> (0.062)      | 1.14 (0.77,1.68) | 0.529   | 1.000                         | 1.31 (0.77,2.24) | 0.316   | 0.972                         | 1.03 (0.53,2.02) | 0.935 | 1.000                         |
| rs7533315                          | 11860683              | T/ <u>C</u> (0.240)      | 0.95 (0.72,1.25) | 0.713   | 1.000                         | 1.03 (0.72,1.49) | 0.869   | 1.000                         | 0.82 (0.53,1.27) | 0.364 | 0.998                         |
| rs9651118                          | 11862214              | C/ <u>T</u> (0.254)      | 0.98 (0.75,1.27) | 0.858   | 1.000                         | 0.89 (0.64,1.25) | 0.505   | 1.000                         | 1.13 (0.71,1.81) | 0.599 | 1.000                         |
| rs7553194                          | 11864149              | A/ <u>G</u> (0.095)      | 1.23 (0.86,1.78) | 0.258   | 0.979                         | 1.11 (0.71,1.73) | 0.660   | 1.000                         | 1.79 (0.90,3.55) | 0.098 | 0.823                         |
| rs13306561                         | 11865804              | C/ <u>T</u> (0.158)      | 1.25 (0.93,1.68) | 0.134   | 0.865                         | 1.26 (0.87,1.83) | 0.228   | 0.931                         | 1.35 (0.82,2.21) | 0.238 | 0.981                         |
| CRC specific survival <sup>c</sup> |                       |                          |                  |         |                               |                  |         |                               |                  |       |                               |
| rs4846048                          | 11846252              | G/ <u>A</u> (0.294)      | 1.80 (1.22,2.65) | 0.003   | 0.057                         | 2.07 (1.21,3.54) | 0.008   | 0.128                         | 1.09 (0.55,2.16) | 0.811 | 1.000                         |
| rs2184226                          | 11847436              | G/ <u>A</u> (0.069)      | 1.07 (0.51,2.23) | 0.867   | 1.000                         | 0.66 (0.15,2.89) | 0.583   | 1.000                         | 0.84 (0.29,2.50) | 0.760 | 1.000                         |
| rs3737966                          | 11847759              | G/ <u>A</u> (0.386)      | 2.17 (1.49,3.14) | <0.0001 | 0.003                         | 3.13 (1.82,5.39) | <0.0001 | 0.003                         | 1.33 (0.71,2.49) | 0.378 | 0.996                         |
| rs4846049                          | 11850365              | T/ <u>G</u> (0.325)      | 2.09 (1.43,3.07) | 0.0002  | 0.005                         | 3.20 (1.84,5.60) | <0.0001 | 0.002                         | 1.39 (0.71,2.72) | 0.343 | 0.993                         |
| rs1476413                          | 11852300              | A/ <u>G</u> (0.267)      | 2.66 (1.76,4.03) | <0.0001 | 0.003                         | 3.17 (1.76,5.71) | 0.0001  | 0.003                         | 2.66 (1.34,5.27) | 0.005 | 0.105                         |
| rs1801131                          | 11854476              | C/ <u>A</u> (0.306)      | 2.06 (1.40,3.04) | 0.0003  | 0.007                         | 3.30 (1.89,5.76) | <0.0001 | 0.003                         | 1.24 (0.62,2.47) | 0.538 | 1.000                         |
| rs12121543                         | 11854671              | A/ <u>C</u> (0.241)      | 2.27 (1.47,3.49) | 0.0002  | 0.005                         | 3.36 (1.88,6.01) | <0.0001 | 0.003                         | 1.38 (0.63,3.02) | 0.423 | 0.998                         |
| rs1801133                          | 11856378              | T/ <u>C</u> (0.319)      | 0.52 (0.33,0.82) | 0.005   | 0.086                         | 0.28 (0.13,0.60) | 0.001   | 0.021                         | 0.85 (0.43,1.67) | 0.630 | 1.000                         |
| rs1572151                          | 11857711              | G/ <u>A</u> (0.069)      | 1.17 (0.59,2.35) | 0.652   | 1.000                         | 0.71 (0.18,2.80) | 0.624   | 1.000                         | 0.93 (0.33,2.64) | 0.892 | 1.000                         |
| rs4846052                          | 11857951              | T/ <u>C</u> (0.394)      | 1.95 (1.37,2.78) | 0.0002  | 0.005                         | 2.76 (1.63,4.69) | 0.0002  | 0.005                         | 1.24 (0.69,2.25) | 0.470 | 0.999                         |
| rs2066471                          | 11860458              | A/ <u>G</u> (0.177)      | 2.43 (1.50,3.94) | 0.0003  | 0.007                         | 2.41 (1.21,4.80) | 0.012   | 0.181                         | 2.66 (1.18,6.02) | 0.019 | 0.314                         |
| rs13306567                         | 11860465              | C/ <u>G</u> (0.058)      | 0.94 (0.49,1.79) | 0.845   | 1.000                         | 1.66 (0.71,3.88) | 0.241   | 0.924                         | 0.22 (0.04,1.09) | 0.064 | 0.672                         |
| rs7533315                          | 11860683              | T/ <u>C</u> (0.243)      | 2.03 (1.32,3.13) | 0.001   | 0.021                         | 2.09 (1.07,4.09) | 0.032   | 0.363                         | 1.55 (0.82,2.94) | 0.180 | 0.940                         |
| rs9651118                          | 11862214              | C/ <u>T</u> (0.255)      | 0.75 (0.47,1.20) | 0.230   | 0.933                         | 0.78 (0.41,1.48) | 0.449   | 0.983                         | 1.19 (0.46,3.10) | 0.724 | 1.000                         |
| rs7553194                          | 11864149              | A/ <u>G</u> (0.094)      | 2.00 (1.13,3.52) | 0.017   | 0.237                         | 2.25 (1.12,4.53) | 0.023   | 0.299                         | 2.22 (0.77,6.42) | 0.141 | 0.895                         |
| rs13306561                         | 11865804              | C/ <u>T</u> (0.153)      | 1.43 (0.91,2.25) | 0.119   | 0.800                         | 2.38 (1.26,4.50) | 0.007   | 0.120                         | 0.72 (0.31,1.70) | 0.452 | 0.999                         |

Abbreviations: CRC, colorectal cancer; HR, hazard ratio; *MTHFR*, methylenetetrahydrofolate reductase; MAF, minor allele frequency. <sup>a</sup> SNPs locations were mapped according to the NCBI build 36 coordinates. <sup>b</sup> Cox proportional hazard model adjusted for sex, age at diagnosis, stage at diagnosis, race, marital status and MSI status. <sup>c</sup> Cox proportional hazard model adjusted for sex, age at diagnosis, stage at diagnosis, drink status, folate taken status, marital status and MSI status. <sup>d</sup> *P*-values were adjusted for multiple comparisons using a modification of *P*<sub>ACT</sub> for correlated tests developed by Conneely and Boehnke [35].

A

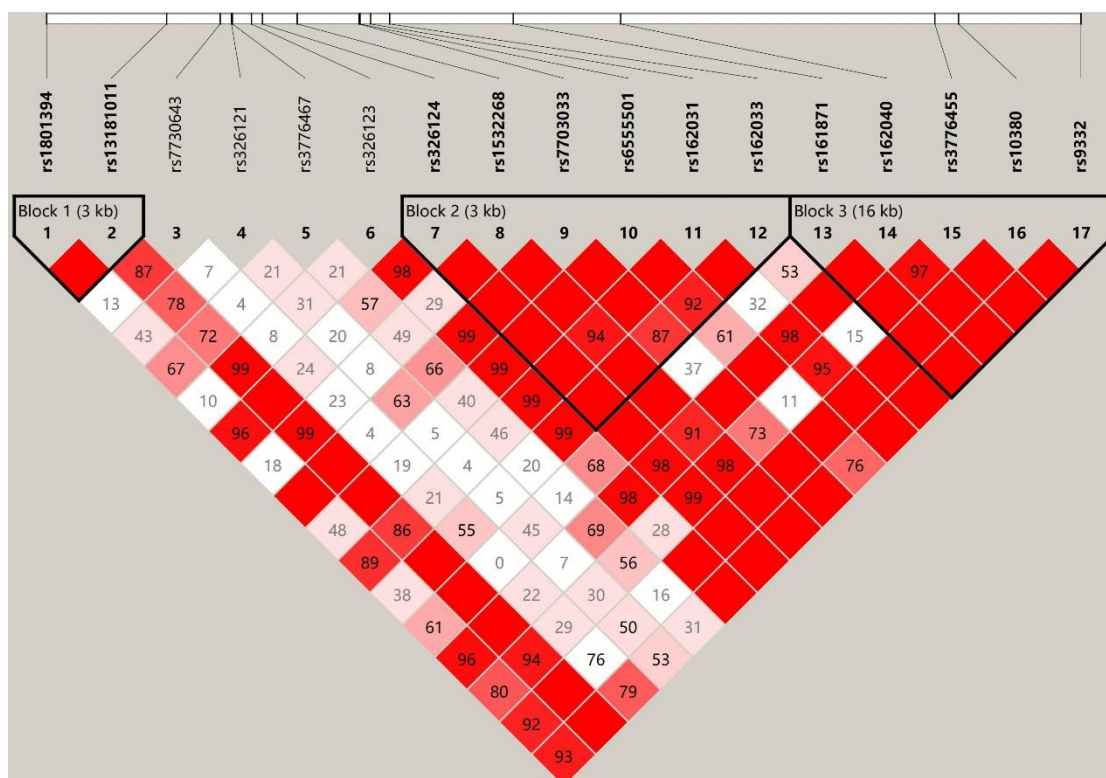

B

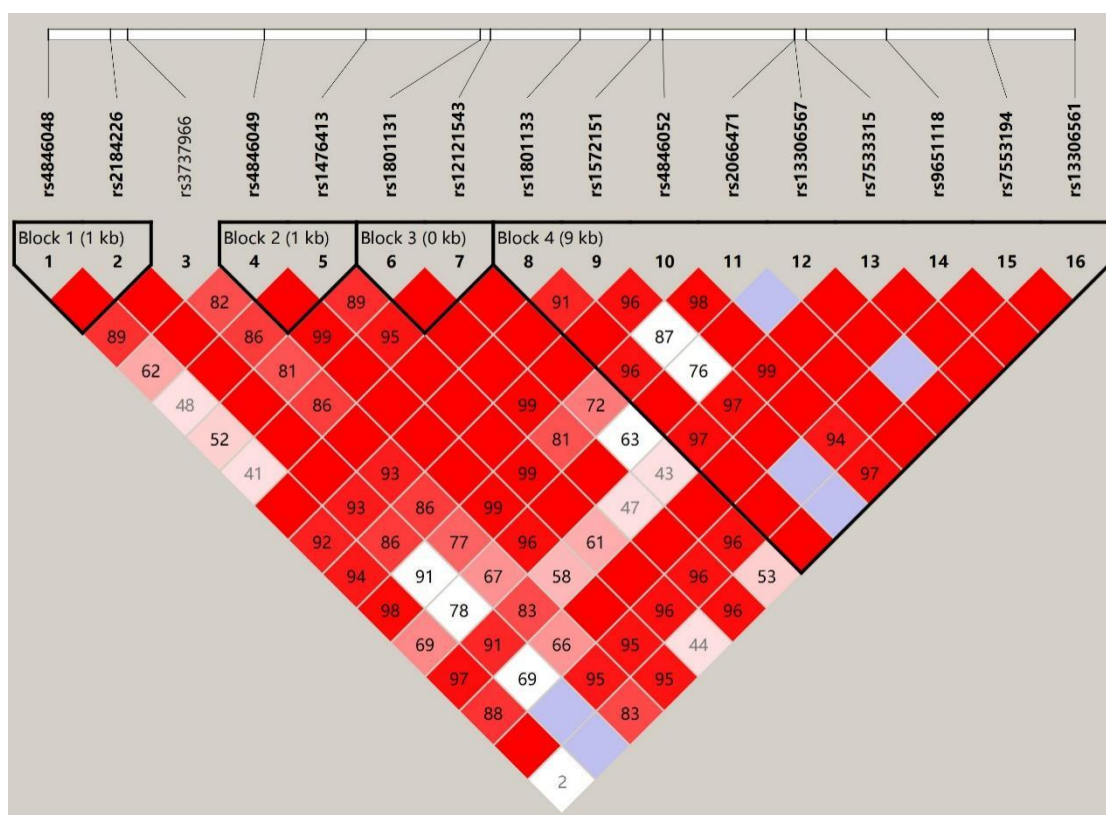

**Figure S1.** The linkage disequilibrium (LD) plot of (A) *MTRR* and (B) *MTHFR* genes. LD strength between the SNPs was indicated by the standard Haploview color scheme based on both  $D'$  and LOD values ( $D' < 1$  and  $\text{LOD} < 2$  in white;  $D' = 1$  and  $\text{LOD} < 2$  in blue;  $D' < 1$  and  $\text{LOD} \geq 2$  in shades of pink/red;  $D' = 1$  and  $\text{LOD} \geq 2$  in bright red). Numbers in squares are  $D'$  ( $\times 100$ ), but those with  $D'$

= 1 are not shown. The black triangle marks the single haplotype block within each gene. *MTRR*, methionine synthase reductase; *MTHFR*, methylenetetrahydrofolate reductase.
